# Supplementary material
Source: MDPI journal article supplement (https://www.mdpi.com/1999-4907/7/4/89)
Supplement: s1 [file s1]

Supplementary Materials: Plant Diversity along the Eastern and Western Slopes of Baima Snow Mountain, China

Yang Yang, Zehao Shen, Jie Han and Ciren Zhongyong


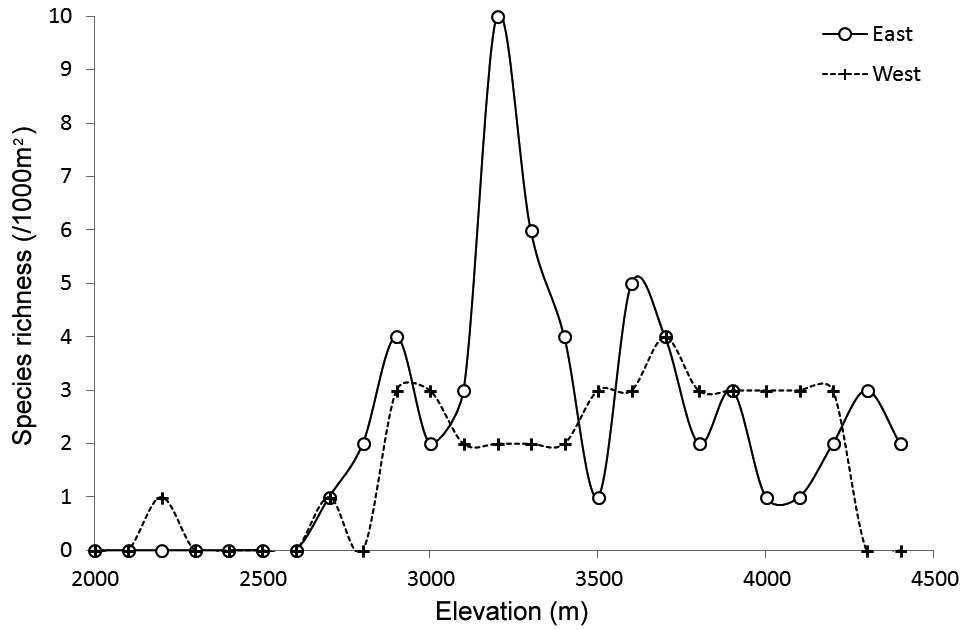


**Figure S1.** Elevational patterns of gymnosperm species richness in the transects on the west and east aspects of the Baima Snow Mountain (BSM).

**Table S1.** Climatic indexes extracted from a Principal component analysis.

| **Variables** | **East Aspect** | | | **West Aspect** | | |
| --- | --- | --- | --- | --- | --- | --- |
| **SD** | **Interpreted Variation** | **Cumulative Interpretation** | **SD** | **Interpreted Variation** | **Cumulative Interpretation** |
| Energy.pc1 | 2.640 | 0.995 | 0.995 | 2.640 | 0.995 | 0.995 |
| Water.pc1 | 2.809 | 0.877 | 0.877 | 2.809 | 0.877 | 0.877 |
| Water.pc2 | 0.935 | 0.097 | 0.974 | 0.935 | 0.097 | 0.974 |
| Clim Var.pc1 | 1.597 | 0.850 | 0.850 | 1.597 | 0.850 | 0.850 |
| Clim Var.pc2 | 0.669 | 0.149 | 0.999 | 0.669 | 0.149 | 0.999 |

**Table S2.** *R*2 of univariable models of Pearson’s correlation.

| **Index** | **East Slope** | | | **West Slope** | | |
| --- | --- | --- | --- | --- | --- | --- |
| **Herb** | **Shrub** | **Tree** | **Herb** | **Shrub** | **Tree** |
| MAT | (-) 0.028 ** | (+) 0.075 *** | (+) 0.145 *** | (+) 0.100 *** | (+) 0.163 ** | (-) 0.278∙ |
| PET | (-) 0.063 *** | (+) 0.032 * | (+) 0.092 ** | (+) 0.097 *** | (+) 0.106 * | (-) 0.338 * |
| Tmin | (-) 0.022 * | (+) 0.093 *** | (+) 0.156 *** | (+) 0.093 *** | (+) 0.161 ** | (-) 0.266∙ |
| AET | (-) 0.013∙ | (+) 0.218 *** | (+) 0.147 *** | (+) 0.106 *** | (+) 0.238 *** | (-) 0.251∙ |
| WD | (-) 0.091 *** | (+) 0.001 | (+) 0.049 * | (+) 0.087 *** | (+) 0.053∙ | (-) 0.405 * |
| Pmax | (+) 0.072 *** | (-) 0.058 ** | (-) 0.101 ** | (-) 0.103 *** | (-) 0.308 *** | (+) 0.201 |
| PWQ | (+) 0.066 *** | (-) 0.053 ** | (-) 0.107 ** | (-) 0.087 *** | (-) 0.331 *** | (+) 0.170 |
| Pmin | (+) 0.294 *** | (+) 0.001 | (+) 0.003 | (-) 0.098 *** | (-) 0.587 *** | (+) 0.144 |
| PDQ | (+) 0.262 *** | (+) 0.0001 | (-) 0.0001 | (-) 0.101 *** | (-) 0.561 *** | (+) 0.149 |
| NPP | (+) 0.455 *** | (+) 0.587 *** | (+) 0.672 *** | (-) 0.082 *** | (+) 0.130 ** | (+) 0.131 |
| ART | (-) 0.353 *** | (-) 0.483 *** | (-) 0.481 *** | (-) 0.001 | (-) 0.341 *** | (+) 0.010 |
| TSN | (-) 0.338 *** | (-) 0.573 *** | (-) 0.439 *** | (+) 0.093 *** | (-) 0.099 * | (-) 0.065 |
| PSN | (-) 0.252 *** | (-) 0.020∙ | (-) 0.017 | (+) 0.299 *** | (+) 0.532 *** | (-) 0.338 * |
| Aspect | (+) 0.010 | (-) 0.028 * | (-) 0.012 | (+) 0.192 *** | (+) 0.025 | (-) 0.214 |
| Slope | (+) 0.455 *** | (+) 0.078 *** | (+) 0.250 *** | (+) 0.189 *** | (+) 0.0001 | (-) 0.027 |

*, *p* < 0.05; **, *p* < 0.01; ***, *p* < 0.001.

**Table S3.** Mantel test and partial Mantel test of beta diversity on the east and the west aspects of BSM. D*e*, D*g*: Euclidian distance between two transects calculated for environmental variables or geographic coordinates (including elevation); D*e* | D*g*, D*g* | D*e*: the distance of the variable left to the “|” with the distance of the variable on the right side accounted for.

| **Distance** | **Variables** | **East Aspect** | | | **West Aspect** | | |
| --- | --- | --- | --- | --- | --- | --- | --- |
| **Herb** | **Shrub** | **Tree** | **Herb** | **Shrub** | **Tree** |
| D*e* | [Energy](http://www.baidu.com/link?url=OH-jF_kBftXDqSIRpt2_FJNkhcHfLMLmVx11GPYZk9F93Ja3pZ7yhBx9PRhkF4tBBfu0mOVUO8LU-L5fmjVfxq) | 0.584 *** | 0.618 *** | 0.613 *** | 0.756 *** | 0.758 *** | 0.622 *** |
| Water | 0.594 *** | 0.644 *** | 0.584 *** | 0.716 *** | 0.691 *** | 0.718 *** |
| Climate var. | 0.495 *** | 0.479 *** | 0.549 *** | 0.478 *** | 0.422 *** | 0.750 *** |
| Productivity | 0.304 *** | 0.278 *** | 0.293 *** | 0.367 *** | 0.360 *** | 0.395 ** |
| Total | 0.629 *** | 0.660 *** | 0.630 *** | 0.749 *** | 0.723 *** | 0.739 *** |
| D*e* | D*g* | Energy | 0.103 | 0.057 | 0.577 *** | 0.500 *** | 0.439 *** | 0.209 * |
| Water | 0.171 * | 0.192 ** | 0.486 *** | 0.534 *** | 0.478 *** | 0.484 *** |
| Climate var. | 0.236 ** | 0.177 ** | 0.406 *** | 0.427 *** | 0.353 *** | 0.568 *** |
| Productivity | 0.272 *** | 0.242 ** | 0.229 * | 0.435 *** | 0.442 *** | 0.333 * |
| Total | 0.269 *** | 0.226 ** | 0.568 *** | 0.548 *** | 0.479 *** | 0.534 *** |
| D*g* | | 0.590 *** | 0.640 *** | 0.416 *** | 0.656 *** | 0.689 *** | 0.606 *** |
| D*g* | D*e* | | 0.011 | 0.090 | 0.012 | 0.301 *** | 0.390 *** | 0.002 |
